# Supplementary material
Source: MDPI journal article supplement (https://www.mdpi.com/2073-4395/11/5/851)
Supplement: s1 [file s1]

Table S1. Chemical characteristics of the organic materials used in the trials.

| <b>Parameters</b>                                     | <b>Coconut Coir Dust</b> | <b>Stabilized Wood Fibre</b> | <b>Green Compost</b> |
|-------------------------------------------------------|--------------------------|------------------------------|----------------------|
| pH                                                    | 6.5                      | 6.9                          | 8.8                  |
| CEC (meq 100g <sup>-1</sup> )                         | 47.4                     | 42.2                         | 80.7                 |
| CE (μS cm <sup>-1</sup> )                             | 131                      | 166                          | 1.250                |
| C (g 100g <sup>-1</sup> )                             | 42.2                     | 47.2                         | 23.0                 |
| Total N (g 100g <sup>-1</sup> )                       | 0.51                     | 0.84                         | 1.85                 |
| Organic N (g 100g <sup>-1</sup> )                     | 0.50                     | 0.84                         | 1.85                 |
| P <sub>2</sub> O <sub>5</sub> (g 100g <sup>-1</sup> ) | < 0.1                    | < 0.1                        | 0.78                 |
| K <sub>2</sub> O (g 100g <sup>-1</sup> )              | 0.77                     | 0.27                         | 2.07                 |
| Ca (g 100g <sup>-1</sup> )                            | 0.53                     | 0.89                         | 5.22                 |
| Mg (g 100g <sup>-1</sup> )                            | 0.18                     | 0.13                         | 1.03                 |
| Na (g 100g <sup>-1</sup> )                            | 0.143                    | 0.024                        | 0.064                |
| Fe (mg kg <sup>-1</sup> )                             | 5640                     | 1928                         | 10556                |
| Mn (mg kg <sup>-1</sup> )                             | 57                       | 107                          | 416                  |
| Cu (mg kg <sup>-1</sup> )                             | 9.1                      | 16.6                         | 90                   |
| Zn (mg kg <sup>-1</sup> )                             | 18                       | 57                           | 189                  |
| B (mg kg <sup>-1</sup> )                              | < 1.5                    | < 1.5                        | < 1.5                |
| Cl (mg kg <sup>-1</sup> )                             | 1221                     | 392                          | 2321                 |
